# Supplementary material for: Multiple responsive hydrogel films based on dynamic Schiff base linkages
Source: Royal Society of Chemistry journal article supplement (doi:10.1039/c4py00868e), 2014-08-28
Supplement: c4py00868e1.pdf [file c4py00868e1.pdf]

Supporting Information for

### Multiple Responsive Hydrogel Films Based on Dynamic Schiff Base Linkages

Lin Zhou, Mao Chen, Ying Guan, and Yongjun Zhang\*

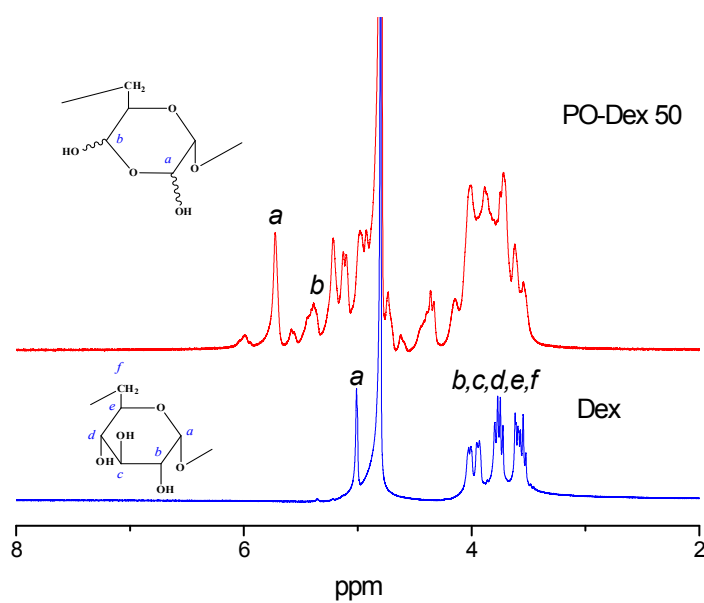

Fig S1. <sup>1</sup>H NMR spectra of Dex and PO-Dex with an oxidation degree of 50%. The solvent is D<sub>2</sub>O. The structures of Dex and PO-Dex are shown in Scheme 1. The two peaks at 5.7 and 5.4 ppm in the spectra of PO-Dex are assigned to the hemiacetal structure. No peaks were found over 8 ppm. These results indicate aldehyde structures formed in PO-Dex but existed mainly as hemiacetals.
